# Supplementary material for: Steady/transient state spectral researches on the solvent-triggered and photo-induced novel properties of metal-coordinated phthalocyanines
Source: Royal Society of Chemistry journal article supplement (doi:10.1039/d1ra08345g), 2022-01-01
Supplement: d1ra08345g1.pdf [file d1ra08345g1.pdf]

## Steady/Transient State Spectra Researches on Solvent-Triggered and Photo-Induced Novel Properties of Metal-Coordinated Phthalocyanines

Hongyu Cao,<sup>a,c</sup> Meina Gong,<sup>a</sup> Mengyan Wang,<sup>b</sup> Qian Tang,<sup>a,c</sup> Lihao Wang<sup>b</sup> and Xuefang Zheng<sup>\*b,c</sup>

Table S1 Absorption spectroscopic data of different metal phthalocyanine compounds in DMSO

| MPc    | B-band $\lambda_{\max}$ (nm) | Q-band $\lambda_{\max}$ (nm) |
|--------|------------------------------|------------------------------|
| FePc   | 328                          | 591/653                      |
| CoPc   | 326                          | 595/656                      |
| ZnPc   | 344                          | 607/672                      |
| AlClPc | 350                          | 607/675                      |

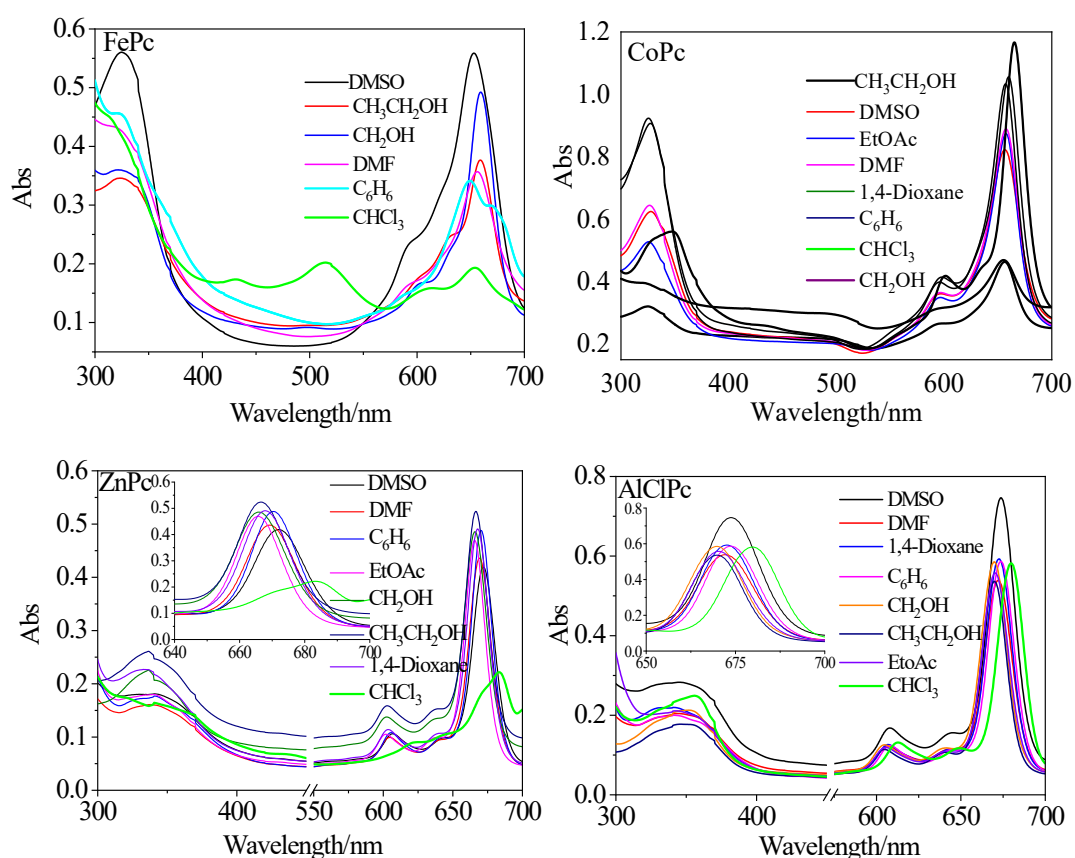

Fig. S1 UV-Vis spectra of FePc, CoPc, ZnPc and AlClPc in different solvents

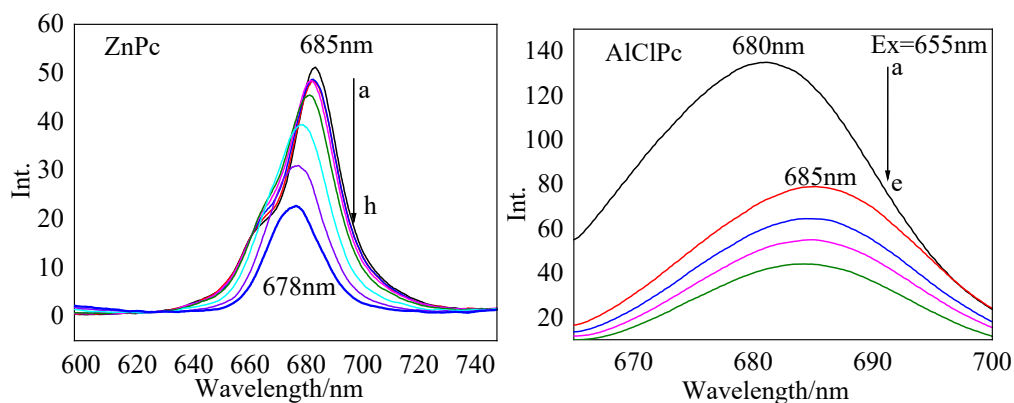

Fig. S2 Fluorescence spectra of ZnPc and AlClPc after xenon lamp irradiation in DMSO )  
(a-h indicates the irradiation duration of the xenon lamp 0, 5, 10, 15, 30, 60, 90 and 120 minutes)

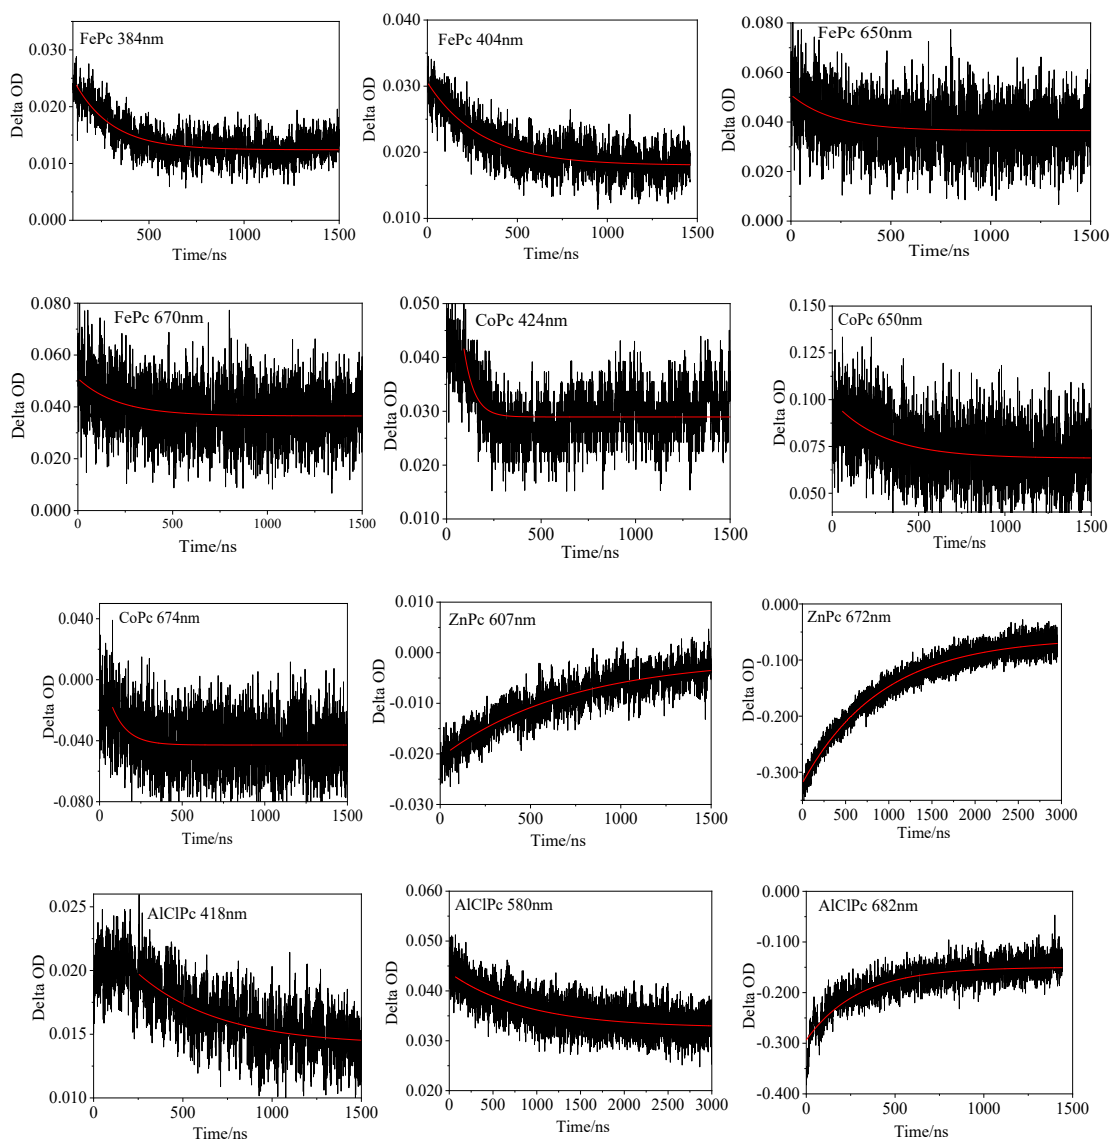

Fig. S3 Transient decay curves of FePc, CoPc, ZnPc and AlClPc excitation with 355 nm laser pulse in DMSO
